# Supplementary material
Source: PubMed Central journal article supplement (PMC10078004)
Supplement: AJP-85-0-s001.pdf [file AJP-85-0-s001.pdf]

## **Supporting Information - Figures**

### **Viruses in sanctuary chimpanzees across Africa**

Emily Dunay, Leah A. Owens, Christopher D. Dunn, Joshua Rukundo, Rebeca Atencia, Megan F. Cole, Averill Cantwell, Melissa Emery Thompson, Alexandra G. Rosati, Tony L. Goldberg\*

\*Correspondence to Tony L. Goldberg ([tony.goldberg@wisc.edu](mailto:tony.goldberg@wisc.edu))

#### **This document contains the following:**

##### **1. Supporting Figures**

- a. Figures S1 & S2:** Phylogenetic trees of viruses identified in sanctuary chimpanzees

Figure S1

# Anelloviruses

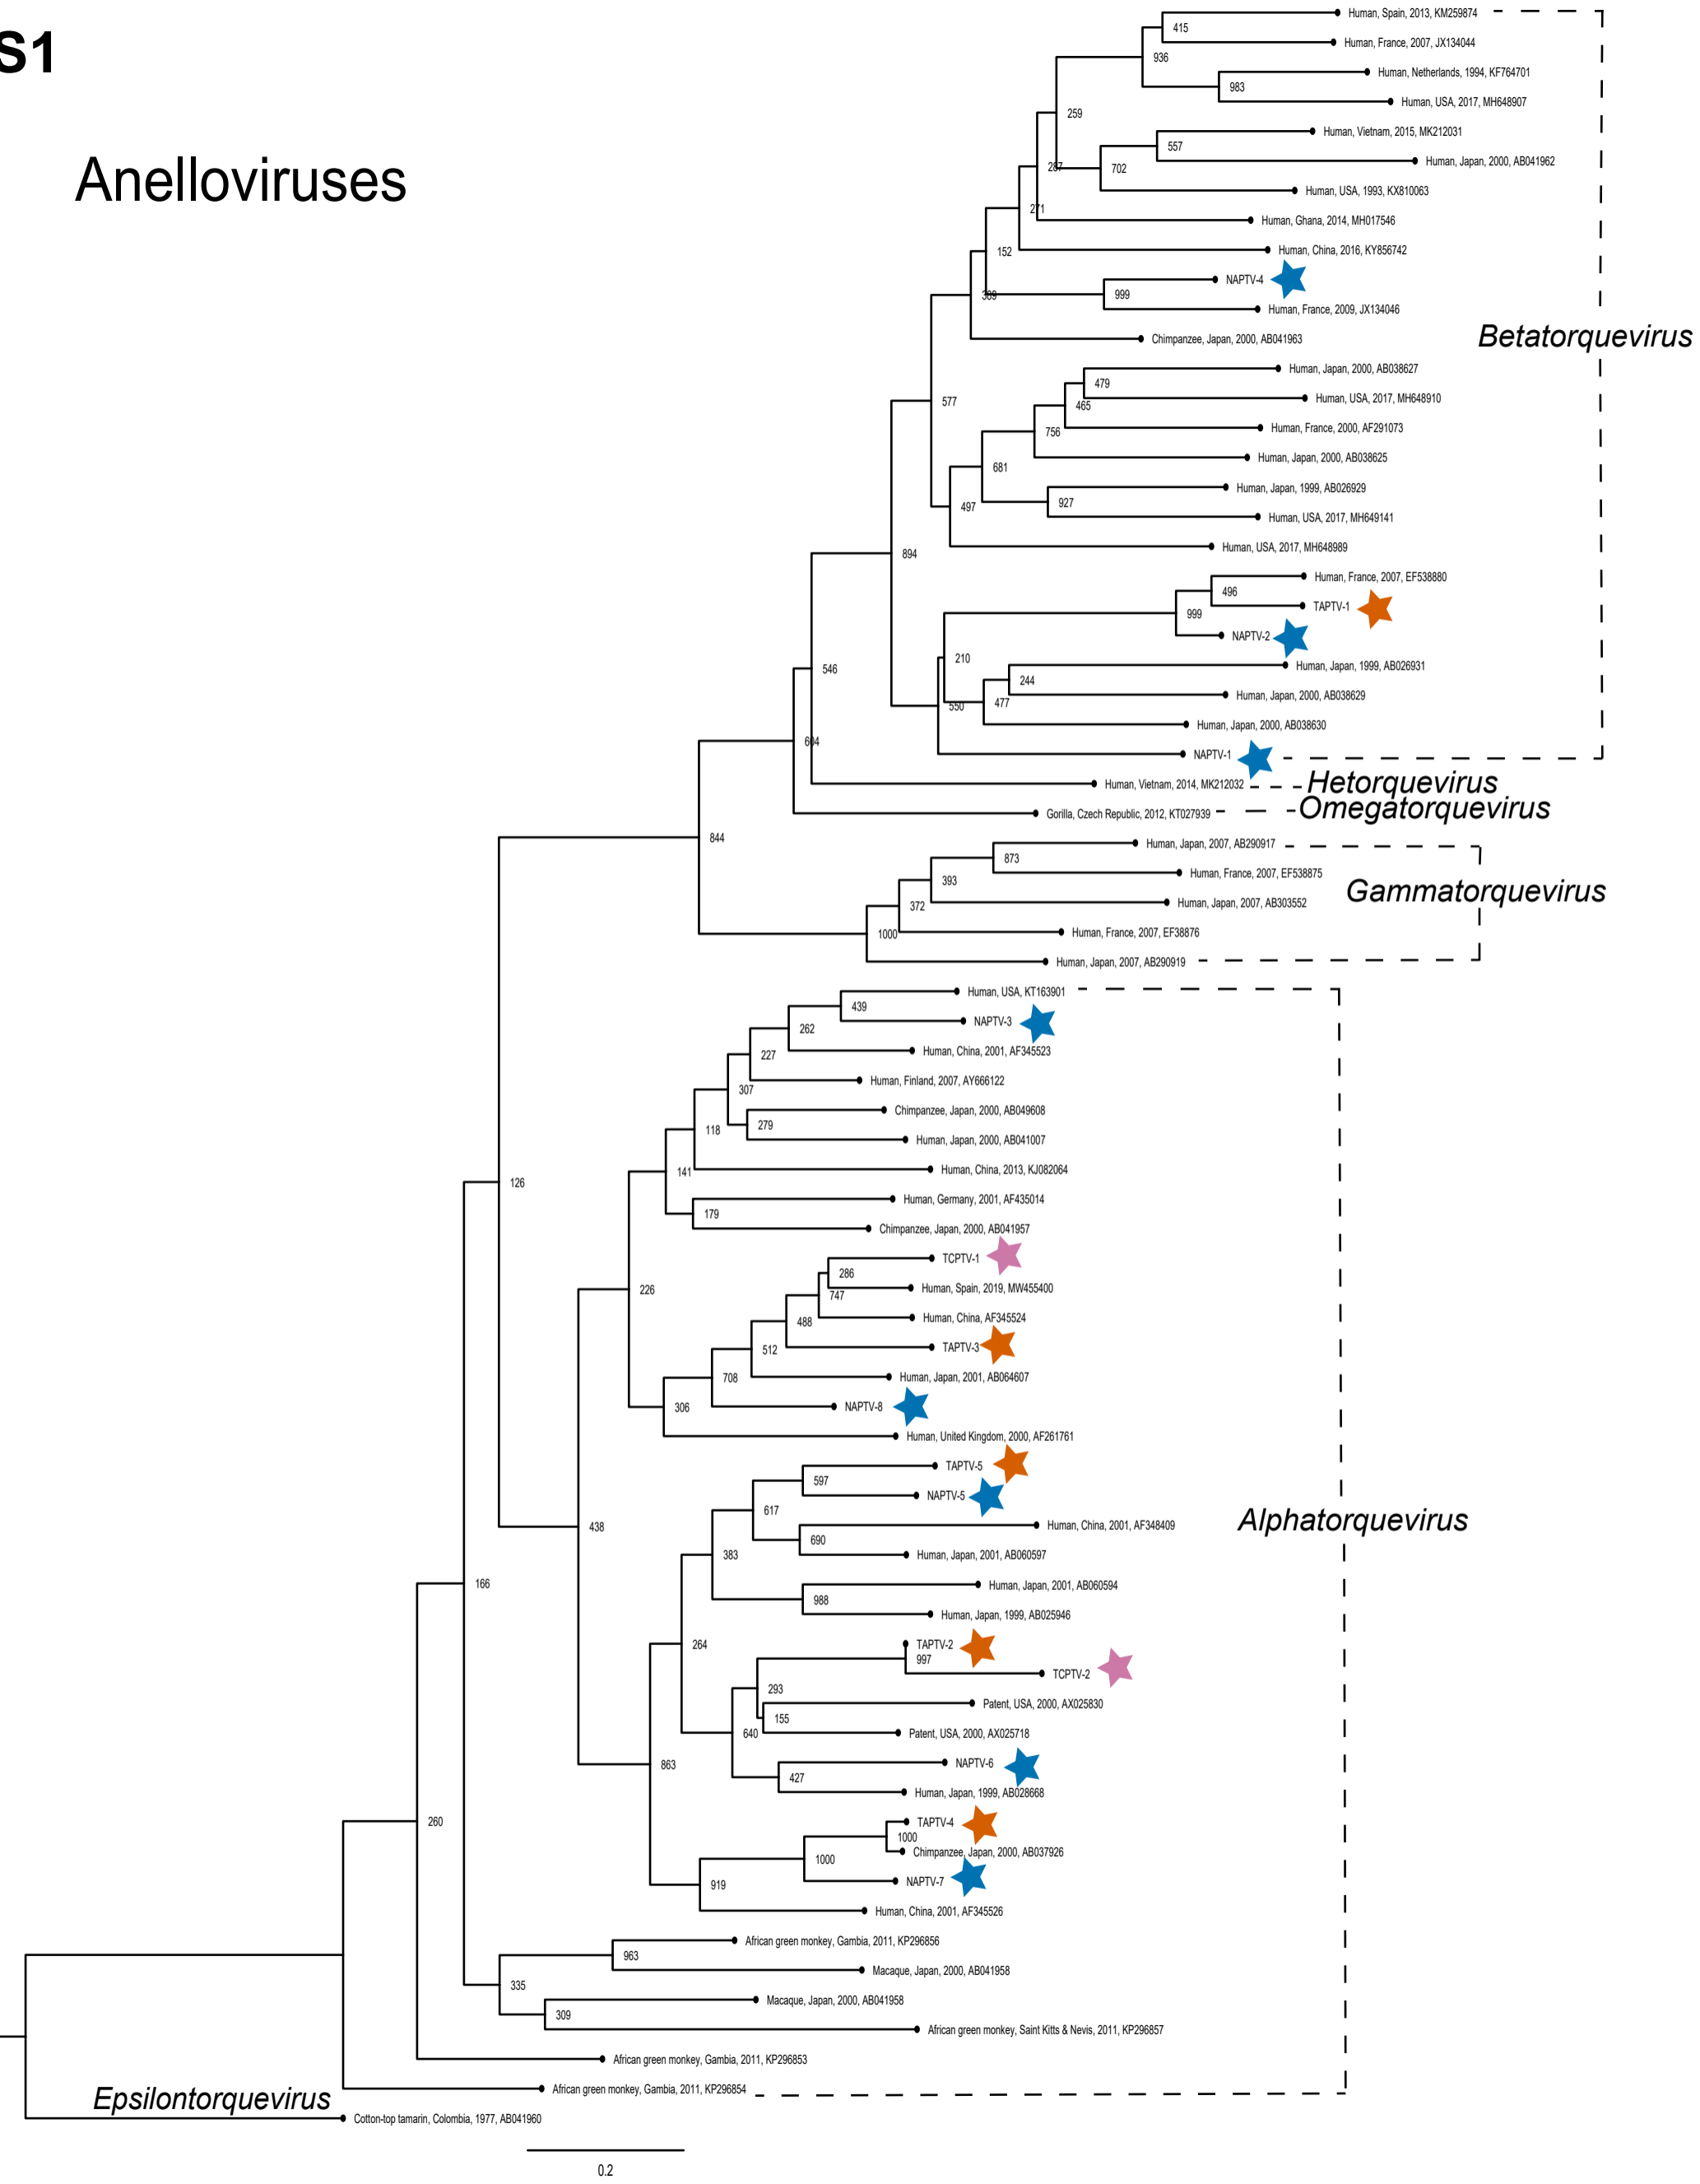

# Pegiviruses

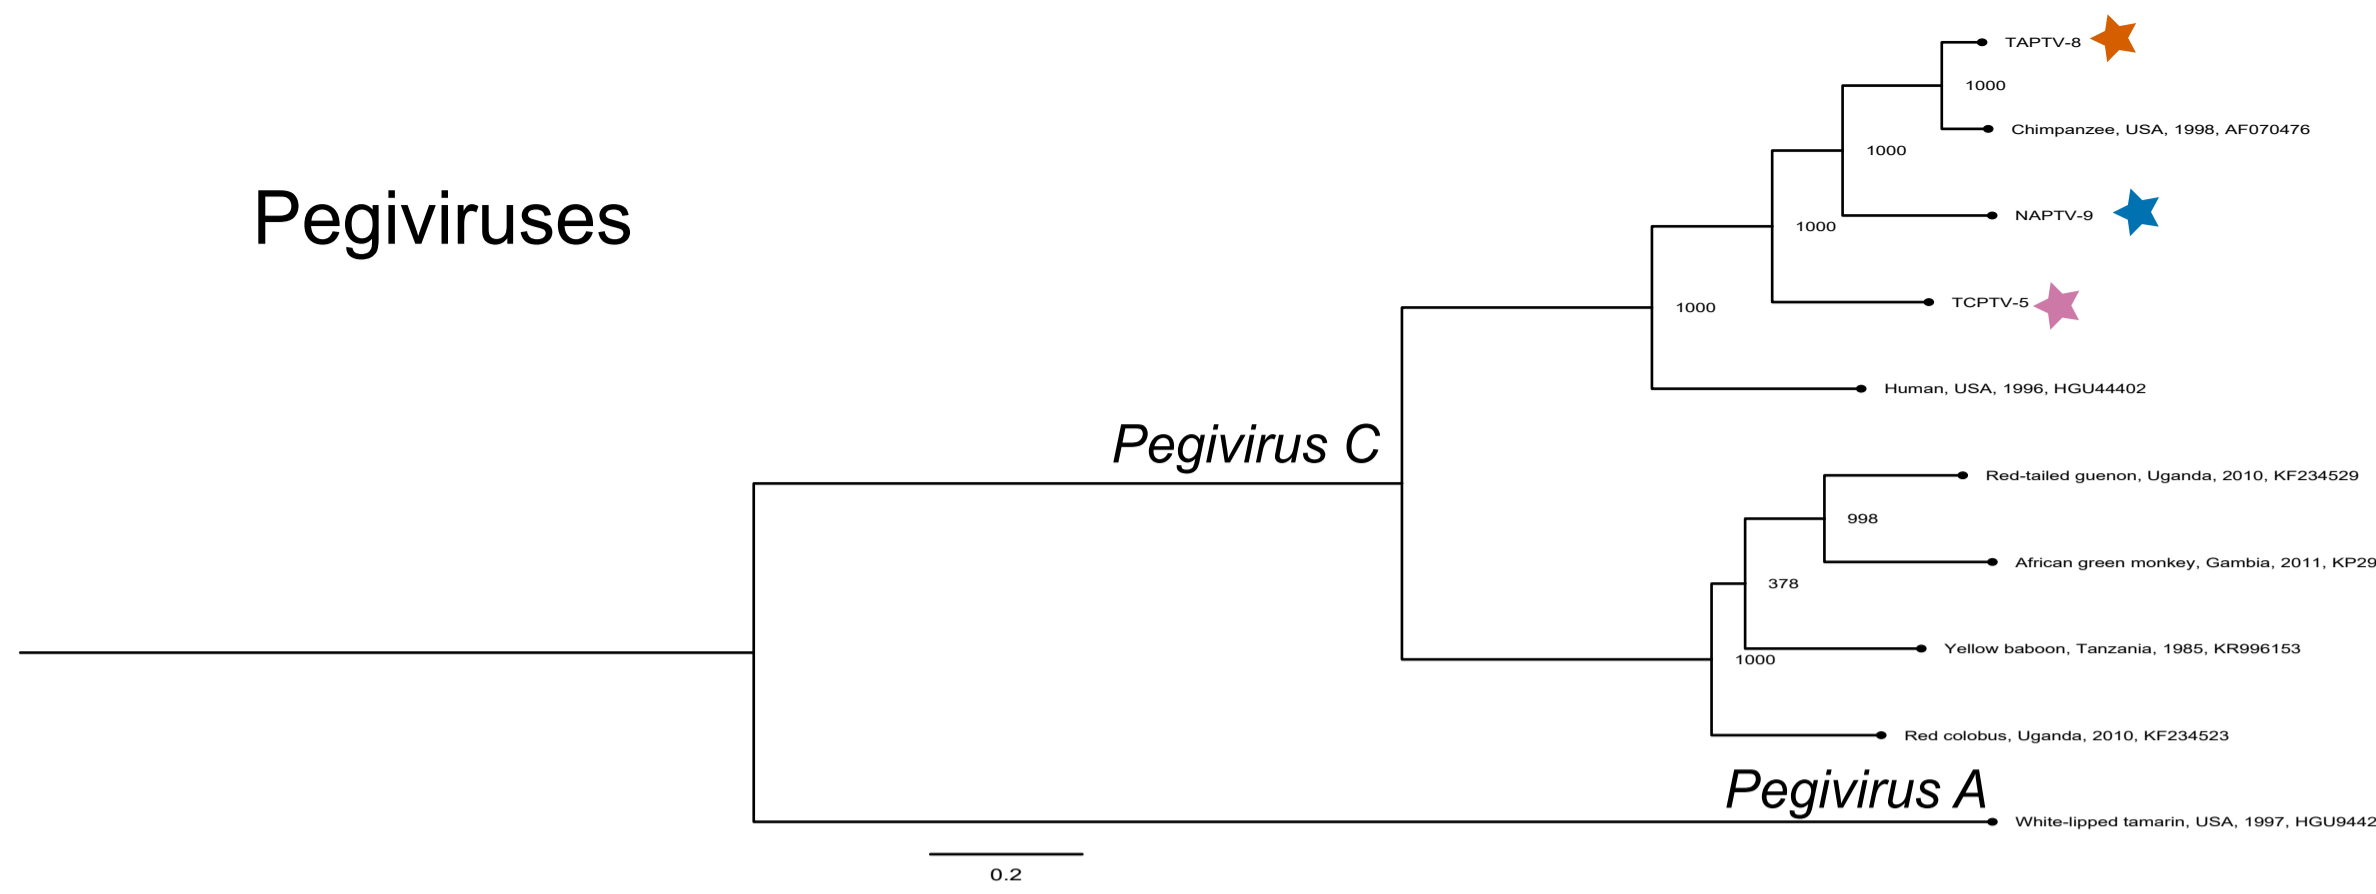

# Picobirnaviruses

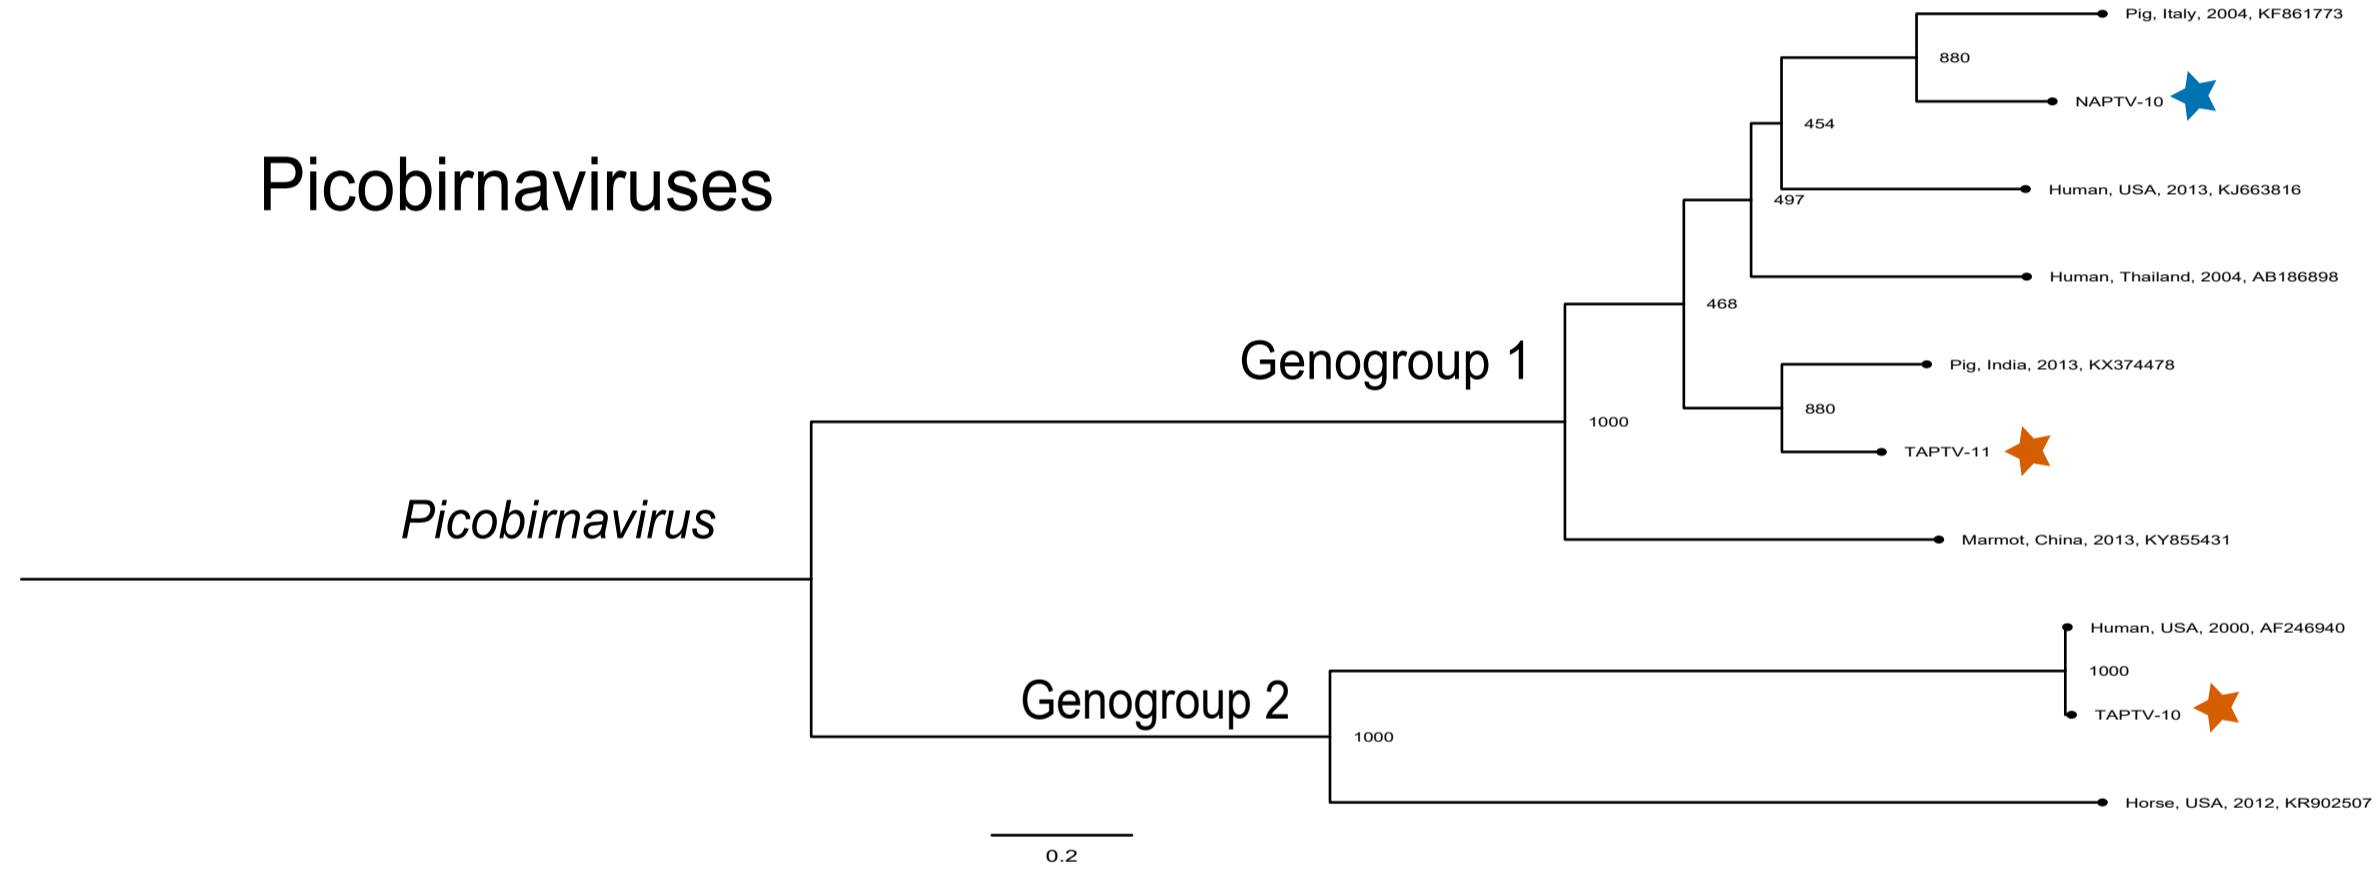

# Gemykibiviruses

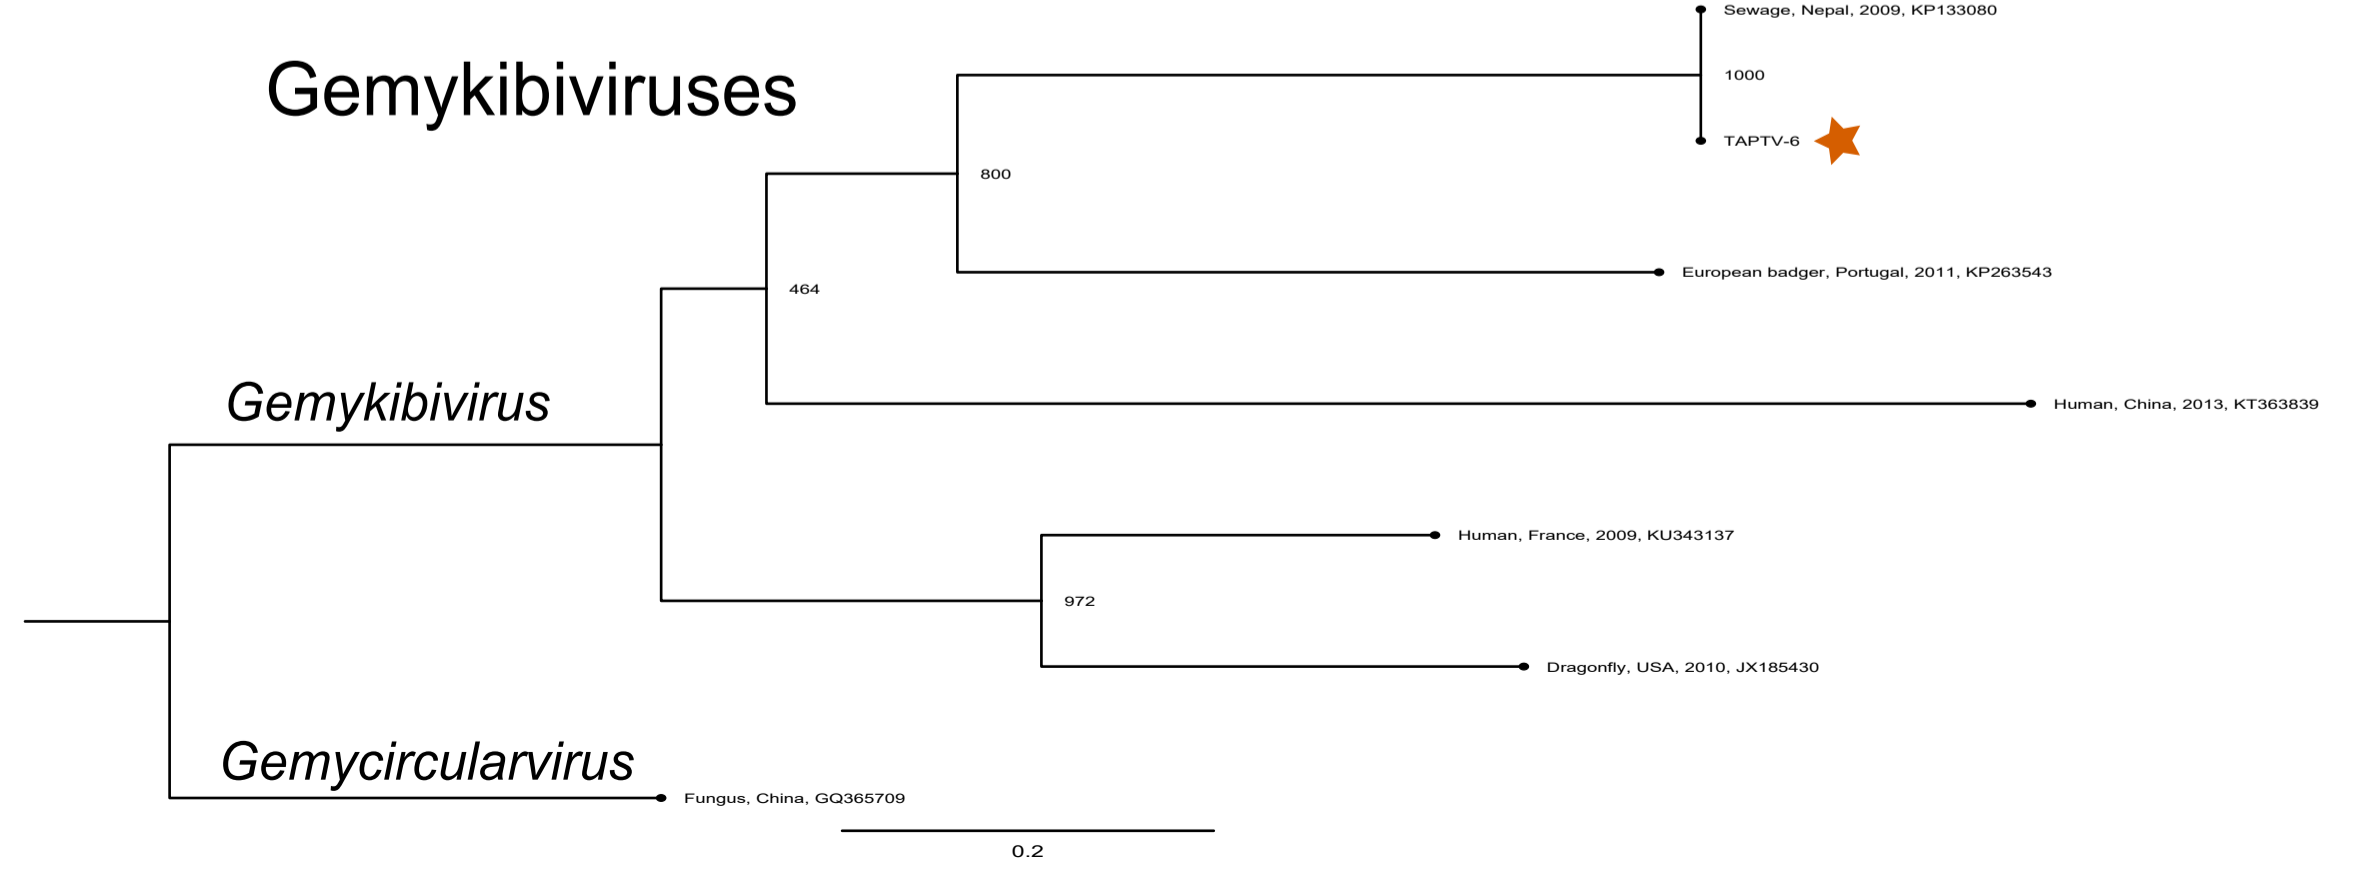

Figure S2

Parvoviruses

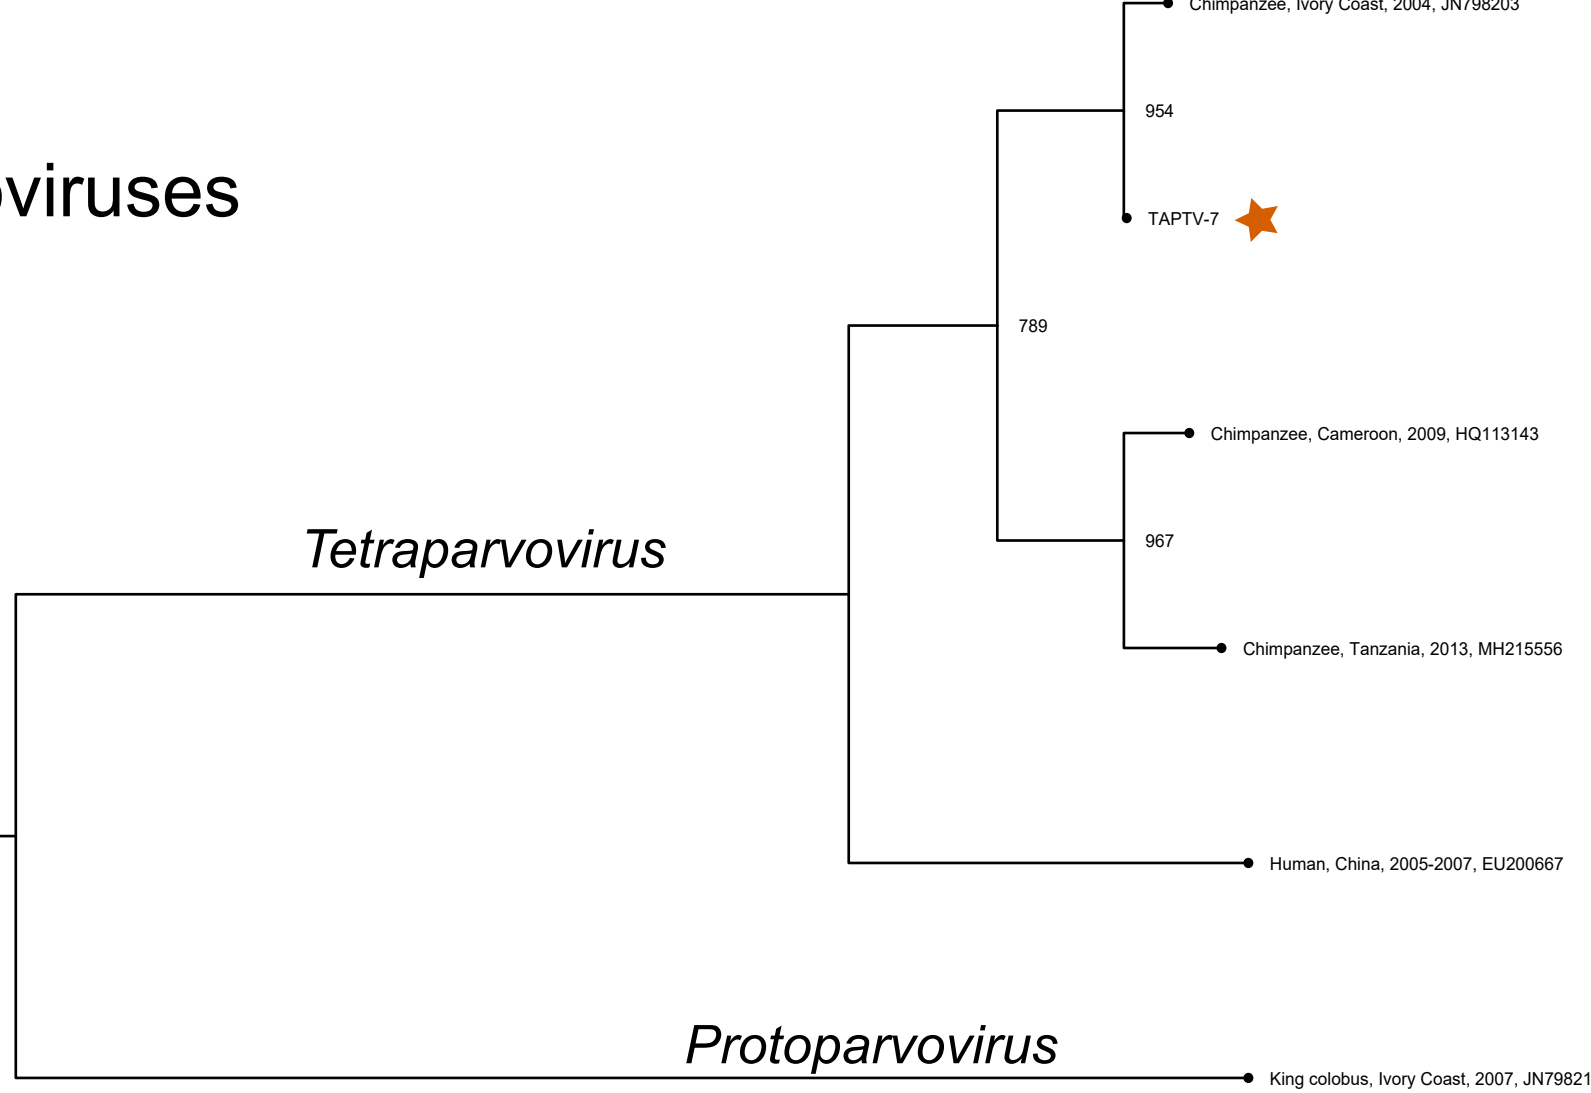

Rhinoviruses

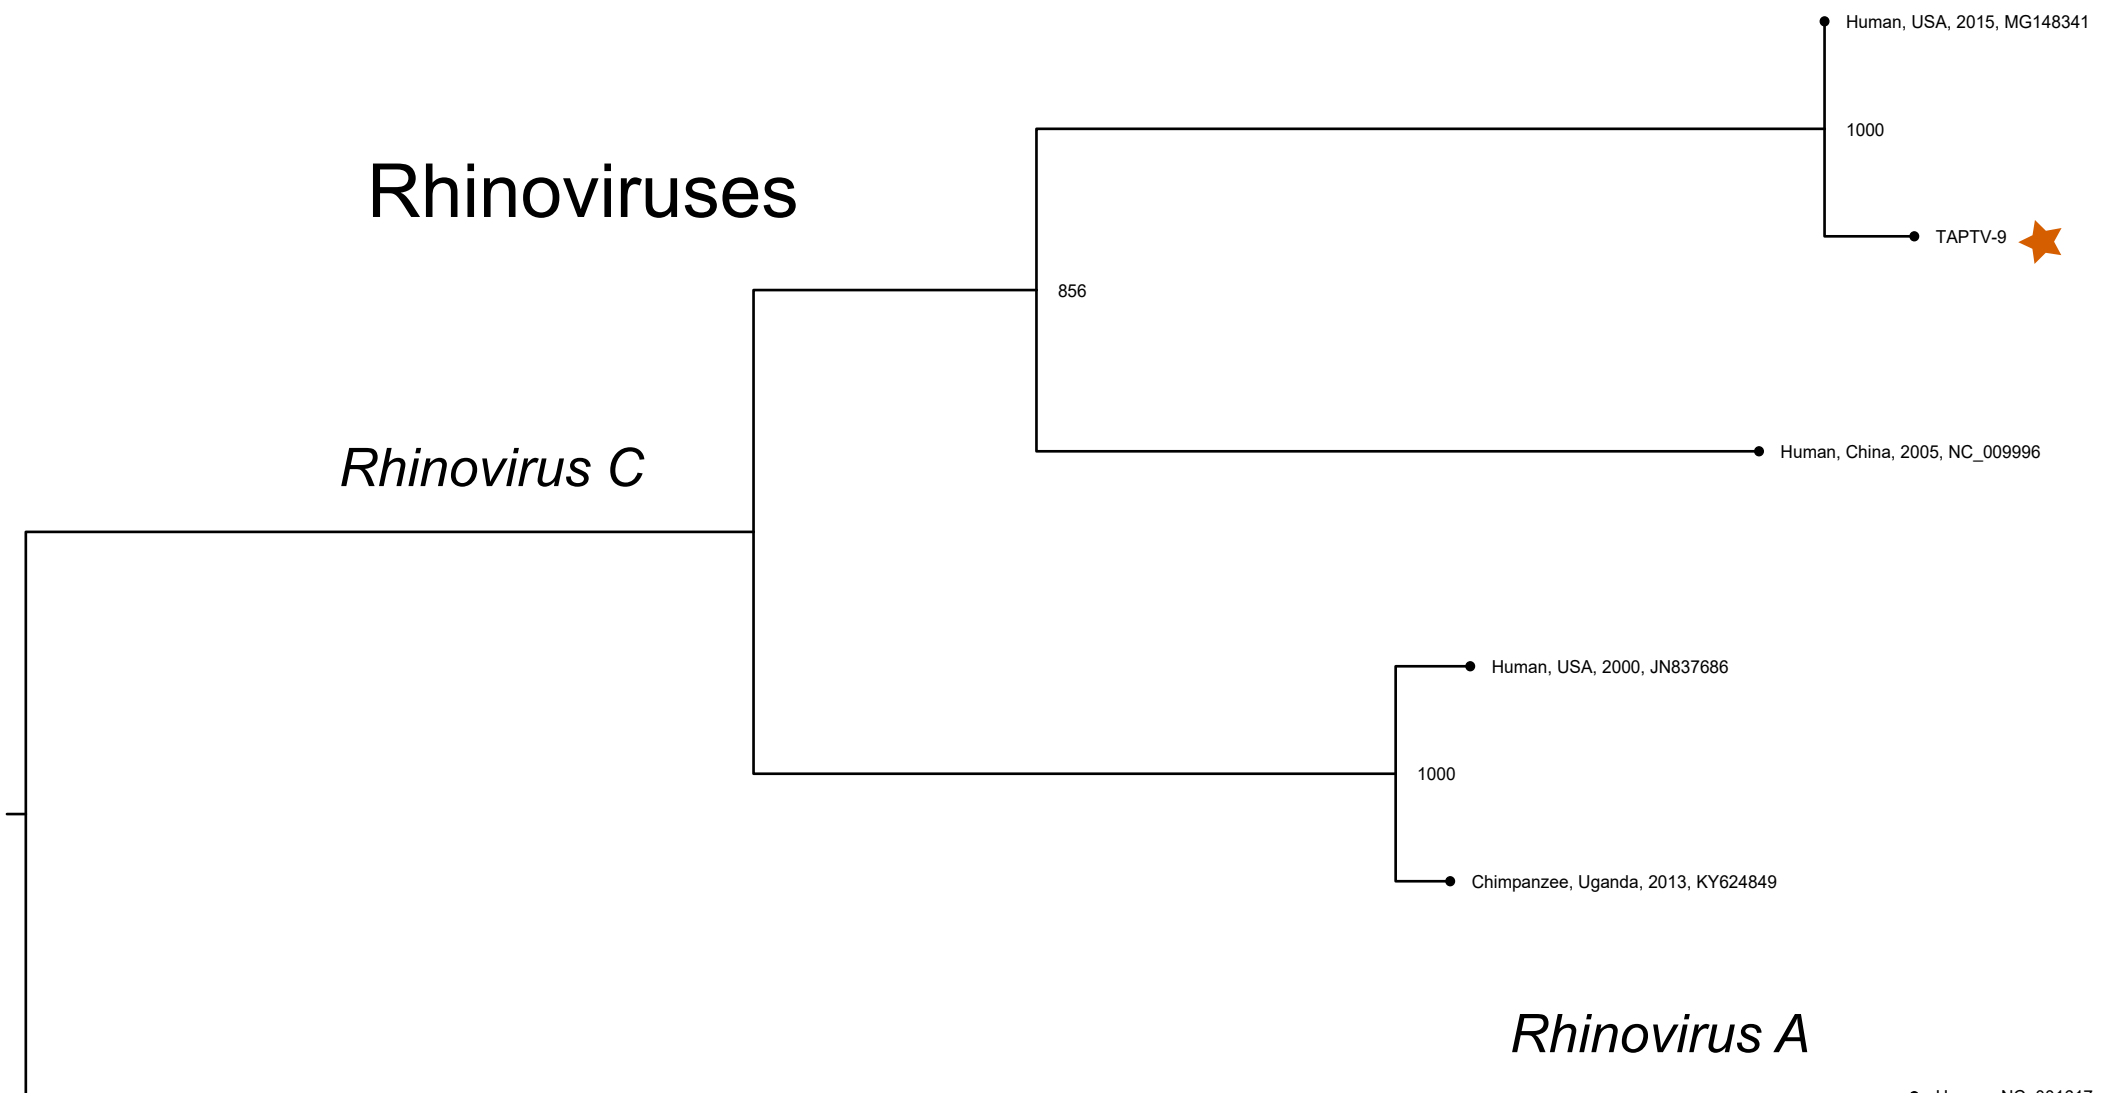

Hepatitis B viruses

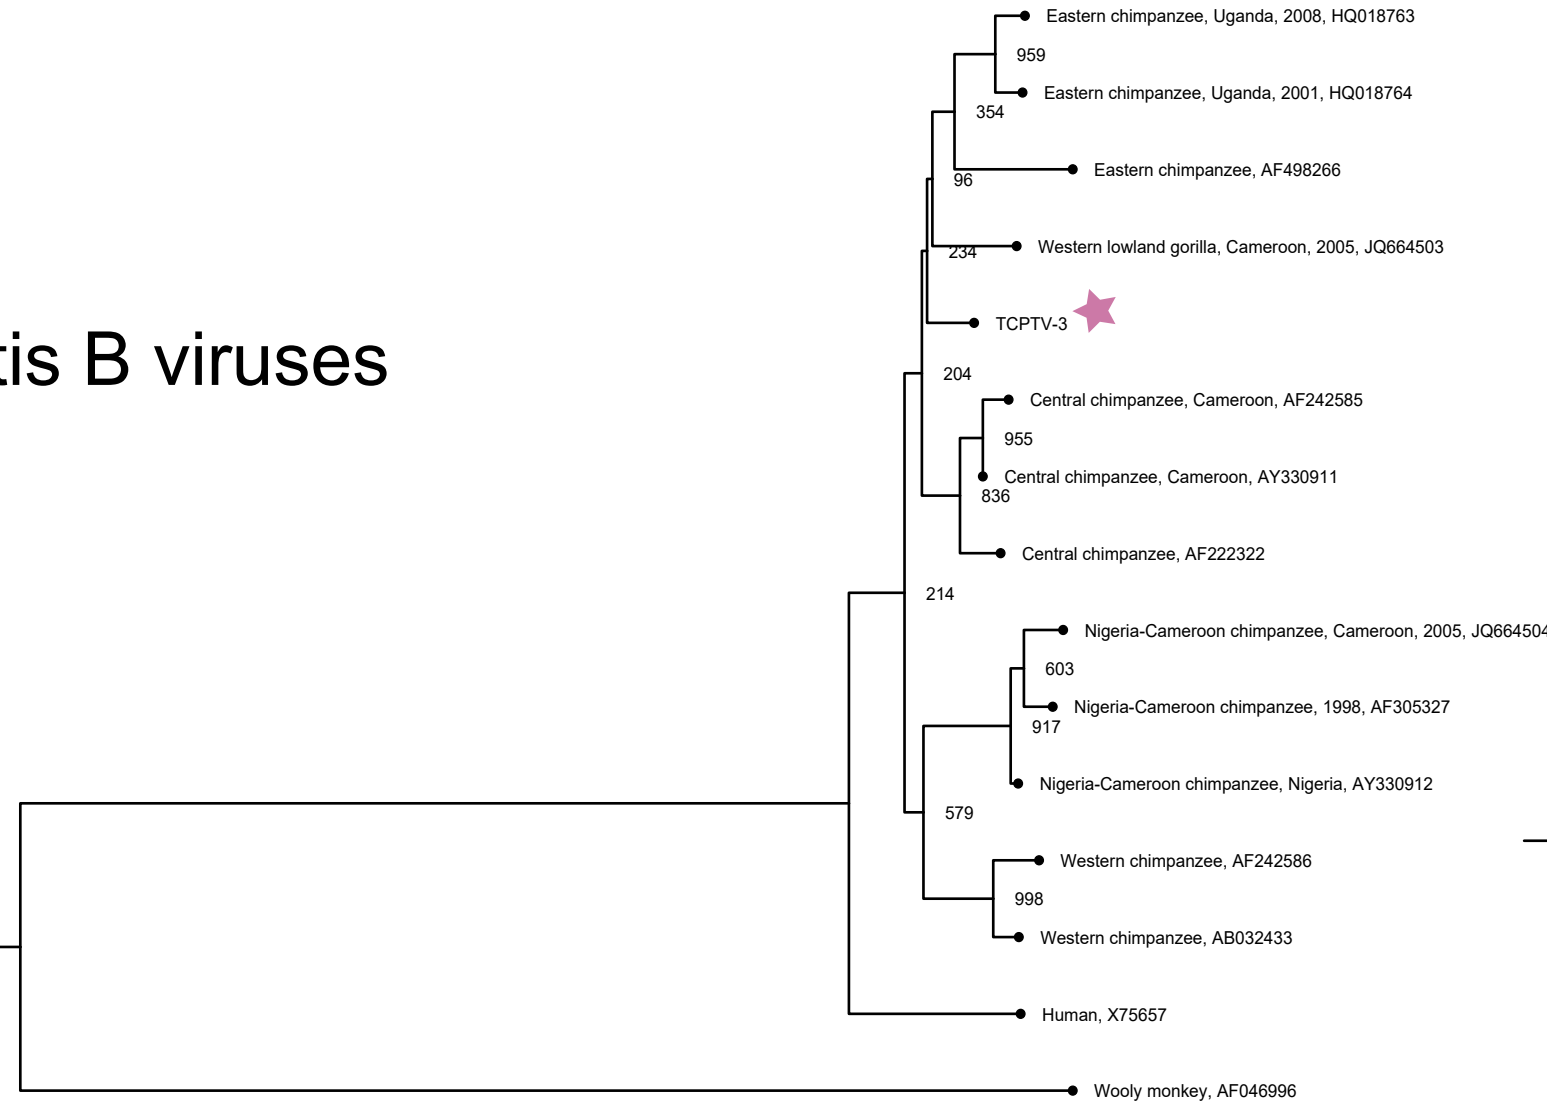

Tibroviruses

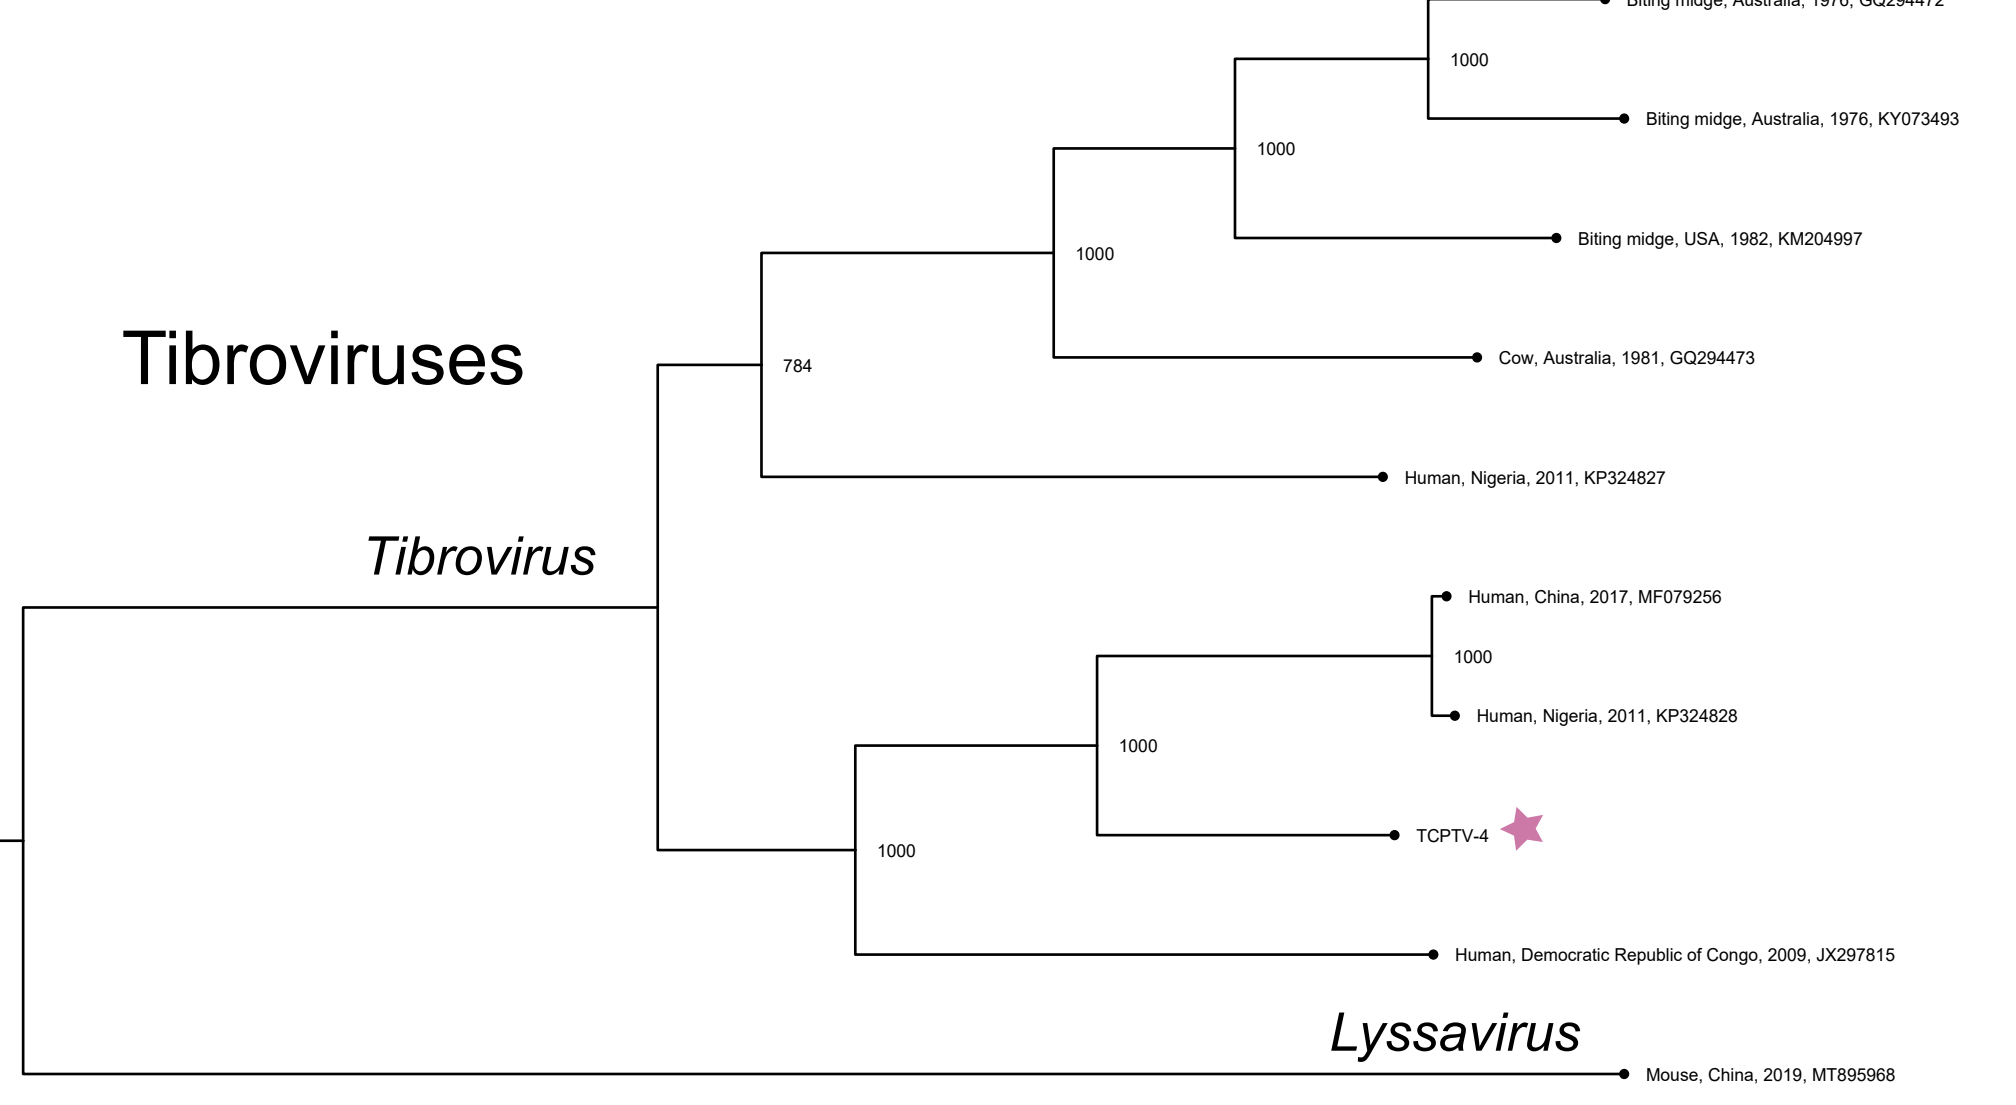

*Hepatitis B virus*

*Rhinovirus C*

*Rhinovirus A*

*Tibrovirus*

*Lyssavirus*
