# Supplementary material
Source: PubMed Central journal article supplement (PMC10078004)
Supplement: AJP-85-0-s002.pdf [file AJP-85-0-s002.pdf]

**Table S1. Detailed sample inventory for chimpanzees included in this study**

| Sanctuary | Chimpanzee         | Sex | Age at time of sampling (years) | Sample type              | Date collected |
|-----------|--------------------|-----|---------------------------------|--------------------------|----------------|
| TCS       | SLE02              | F   | 9                               | Serum                    | 02/03/16       |
|           | SLE05              | F   | 12                              | Serum                    | 02/06/16       |
|           | SLE07              | M   | 12                              | Whole Blood              | 03/30/14       |
|           | SLE08              | F   | 10                              | Serum                    | 11/09/15       |
|           | SLE09              | M   | 5                               | Serum                    | 02/06/16       |
|           | SLE12              | M   | 11                              | Serum                    | 06/08/14       |
|           | SLE14              | F   | 10                              | Serum                    | 02/02/16       |
|           | SLE16              | M   | 9.5                             | Serum                    | 03/15/13       |
|           | SLE18              | M   | 13                              | Plasma                   | 05/30/16       |
|           | SLE23              | F   | 12                              | Serum                    | 03/06/15       |
|           | SLE24              | F   | 14                              | Whole Blood in RNAlater  | 03/22/14       |
|           | SLE25              | F   | 12                              | Spleen                   | 07/11/16       |
|           | SLE26              | F   | 13                              | Plasma                   | 02/11/16       |
|           | SLE27              | M   | 21                              | Serum                    | 05/25/16       |
| SLE28     | F                  | 11  | Serum                           | 01/15/15                 |                |
| SLE30     | F                  | 14  | Serum                           | 06/03/14                 |                |
| TCRC      | ROC01              | M   | 19                              | Plasma in DNA/RNA Shield | 06/16/19       |
|           | ROC24              | M   | 21                              | Plasma in DNA/RNA Shield | 06/20/19       |
|           | ROC09              | M   | 16.5                            | Plasma in DNA/RNA Shield | 06/17/19       |
|           | ROC21              | M   | 22                              | Plasma in DNA/RNA Shield | 06/19/19       |
|           | ROC08              | M   | 23                              | Plasma in DNA/RNA Shield | 06/17/19       |
|           | ROC25              | M   | 16.5                            | Plasma in DNA/RNA Shield | 06/20/19       |
|           | ROC14              | F   | 19                              | Plasma in DNA/RNA Shield | 06/18/19       |
|           | ROC12              | M   | 17                              | Plasma in DNA/RNA Shield | 06/18/19       |
|           | ROC16              | M   | 14                              | Plasma in DNA/RNA Shield | 06/18/19       |
|           | ROC05              | F   | 18                              | Plasma in DNA/RNA Shield | 06/18/19       |
|           | ROC07              | M   | 16.5                            | Plasma in DNA/RNA Shield | 06/17/19       |
|           | ROC23              | M   | 18                              | Plasma in DNA/RNA Shield | 06/17/19       |
|           | ROC13              | F   | 17                              | Plasma in DNA/RNA Shield | 06/20/19       |
|           | ROC10              | F   | 23                              | Plasma in DNA/RNA Shield | 06/17/19       |
|           | ROC26              | M   | 18                              | Plasma in DNA/RNA Shield | 06/19/19       |
|           | ROC20              | M   | 18                              | Plasma in DNA/RNA Shield | 06/20/19       |
|           | ROC15              | F   | 21                              | Plasma in DNA/RNA Shield | 06/18/19       |
|           | ROC06              | M   | 20                              | Plasma in DNA/RNA Shield | 06/17/19       |
|           | ROC11              | M   | 18                              | Plasma in DNA/RNA Shield | 06/19/19       |
|           | ROC03 <sup>†</sup> | M   | 20                              | Plasma in DNA/RNA Shield | 06/16/19       |
| ROC02     | F                  | 19  | Plasma in DNA/RNA Shield        | 06/16/19                 |                |
| ROC17     | M                  | 18  | Plasma in DNA/RNA Shield        | 06/18/19                 |                |
| ROC18     | M                  | 22  | Plasma in DNA/RNA Shield        | 06/19/19                 |                |
| ROC22     | F                  | 19  | Plasma in DNA/RNA Shield        | 06/19/19                 |                |
| ROC19     | F                  | 19  | Plasma in DNA/RNA Shield        | 06/19/19                 |                |
| NICS      | UGA24              | F   | 12                              | Plasma                   | 07/25/16       |
|           | UGA42              | M   | 19                              | Plasma                   | 08/14/16       |
|           | UGA37              | M   | 19                              | Plasma                   | 08/20/16       |
|           | UGA08              | F   | 27                              | Plasma                   | 07/20/16       |
|           | UGA14              | M   | 17                              | Plasma                   | 07/22/16       |
|           | UGA25              | M   | 20                              | Plasma                   | 07/26/16       |
|           | UGA36              | F   | 29                              | Plasma                   | 08/10/16       |
|           | UGA02              | F   | 32                              | Plasma                   | 07/18/16       |
|           | UGA15              | M   | 17                              | Plasma                   | 07/22/16       |
|           | UGA03              | M   | 32                              | Plasma                   | 07/19/16       |
|           | UGA23              | F   | 11                              | Plasma                   | 07/25/16       |
|           | UGA01              | F   | 32                              | Plasma                   | 07/18/16       |
|           | UGA22              | F   | 11                              | Plasma                   | 07/25/16       |
|           | UGA45              | F   | 15                              | Plasma                   | 08/13/16       |
|           | UGA34              | F   | 18                              | Plasma                   | 08/14/16       |
|           | UGA38              | F   | 15                              | Plasma                   | 08/12/16       |
|           | UGA43              | F   | 17                              | Plasma                   | 08/14/16       |
|           | UGA28              | F   | 20                              | Plasma                   | 07/27/16       |
|           | UGA04              | M   | 17                              | Plasma                   | 07/19/16       |
|           | UGA30              | F   | 17                              | Plasma                   | 07/28/16       |
|           | UGA05              | M   | 30                              | Plasma                   | 07/19/16       |
|           | UGA13              | M   | 12                              | Plasma                   | 07/21/16       |
|           | UGA18              | F   | 25                              | Plasma                   | 07/23/16       |
| UGA33     | F                  | 7   | Plasma                          | 08/16/16                 |                |
| UGA06     | M                  | 29  | Plasma                          | 07/20/16                 |                |
| UGA26     | M                  | 19  | Plasma                          | 07/26/16                 |                |
| UGA35     | M                  | 20  | Plasma                          | 08/15/16                 |                |
| UGA31     | F                  | 18  | Plasma                          | 07/28/16                 |                |

<sup>†</sup>Sanctuary-born

**Table S2: Prevalence and univariate statistical associations between sex (male or female) and prevalence and load of viruses in chimpanzees at TCS, TCRC, and NICS.**

| Virus ID <sup>1</sup> | Chimpanzees Infected (#) | Prevalence (%) <sup>2</sup> |                    |                   |                    | Viral Load (log <sub>10</sub> vRPM/kb) <sup>3</sup> |            |               |               |         |         |
|-----------------------|--------------------------|-----------------------------|--------------------|-------------------|--------------------|-----------------------------------------------------|------------|---------------|---------------|---------|---------|
|                       |                          | Overall (n=16)              | Male (n=6)         | Female (n=10)     | Odds Ratio         | p value                                             | Male (n=6) | Female (n=10) | U             | p value |         |
| TCS                   | 1                        | 16                          | 100 (55.7, 100)    | 100 (67.9, 100)   | 0.62 (0.01, 35.17) | >0.9999                                             | 1.1771     | 1.1277        | 28            | 0.8749  |         |
|                       | 4                        | 1                           | 6.3 (<0.01, 30.3)  | 16.7 (1.1, 58.2)  | 0 (0, 3.2)         | 5.73 (0.20, 165.3)                                  | 0.2745     | 1.0116        | NA            | NA      |         |
|                       | 6                        | 2                           | 12.5 (2.2, 37.3)   | 0 (0, 44.3)       | 20 (45.9, 52.1)    | 0.26 (0.01, 6.44)                                   | >0.9999    | NA            | 0.6418        | NA      |         |
|                       | 7                        | 1                           | 6.3 (<0.01, 30.3)  | 16.7 (1.1, 58.2)  | 0 (0, 3.2)         | 5.73 (0.20, 165.3)                                  | 0.2745     | 0.0859        | NA            | NA      |         |
|                       | 9                        | 4                           | 25 (9.7, 50)       | 33.3 (9.3, 70.4)  | 20 (45.9, 52.1)    | 2 (0.20, 19.91)                                     | 0.978      | 0.8099        | 0.4797        | 2       | 1       |
|                       | 10                       | 5                           | 31.3 (13.9, 55.9)  | 33.3 (9.3, 70.4)  | 30 (10.3, 60.8)    | 1.17 (0.13, 10.22)                                  | >0.9999    | 1.2735        | 0.8347        | 2       | 0.8     |
|                       | 11                       | 5                           | 31.3 (13.9, 55.9)  | 33.3 (9.3, 70.4)  | 30 (10.3, 60.8)    | 1.17 (0.13, 10.22)                                  | >0.9999    | 1.0117        | 0.5693        | 1       | 0.4     |
|                       | 12                       | 6                           | 37.5 (18.4, 61.5)  | 16.7 (1.1, 58.2)  | 50 (23.7, 76.3)    | 0.2 (0.02, 2.39)                                    | 0.4301     | 2.3774        | 0.7477        | 0       | 0.333   |
|                       | 13                       | 7                           | 43.8 (23.1, 66.9)  | 50 (18.8, 81.2)   | 40 (16.7, 68.8)    | 1.5 (0.20, 11.53)                                   | >0.9999    | 1.4375        | 1.1936        | 5       | 0.8571  |
|                       | 24                       | 10                          | 62.5 (38.5, 81.6)  | 50 (18.8, 81.2)   | 70 (39.2, 89.7)    | 0.43 (0.05, 3.48)                                   | 0.7832     | 1.056         | 1.9784        | 16      | 0.2667  |
| 25                    | 1                        | 6.3 (<0.01, 30.3)           | 0 (0, 44.3)        | 10 (<0.01, 42.6)  | 0.49 (0.02, 13.92) | >0.9999                                             | NA         | 0.773         | NA            | NA      |         |
| TCRC                  | Virus ID <sup>1</sup>    | Chimpanzees Infected (#)    | Overall (n=25)     | Male (n=17)       | Female (n=8)       | Odds Ratio                                          | p value    | Male (n=17)   | Female (n=8)  | U       | p value |
|                       | 2                        | 16                          | 64 (44.4, 79.8)    | 58.8 (36, 78.4)   | 75 (40.1, 93.7)    | 0.48 (0.07, 3.09)                                   | 0.7473     | 0.7894        | 0.1608        | 22      | 0.4378  |
|                       | 5                        | 1                           | 4 (<0.01, 21.1)    | 0 (0, 21.6)       | 12.5 (0.11, 49.2)  | 0.14 (0.01, 3.92)                                   | >0.9999    | NA            | 1.183         | NA      | NA      |
|                       | 14                       | 3                           | 12 (3.3, 30.8)     | 11.7 (2, 35.6)    | 12.5 (0.11, 49.2)  | 0.933 (0.07, 12.1)                                  | >0.9999    | 0.7221        | 0.4738        | 1       | 1       |
|                       | 15                       | 5                           | 20 (8.4, 39.6)     | 17.7 (5.4, 41.8)  | 25 (6.3, 59.9)     | 0.64 (0.08, 4.89)                                   | >0.9999    | 0.7178        | 0.355         | 1       | 0.4     |
| 26                    | 10                       | 40 (23.4, 59.3)             | 41.2 (21.6, 64.1)  | 37.5 (13.5, 69.6) | 1.17 (0.21, 6.56)  | >0.9999                                             | 0.9527     | 0.2391        | 7             | 0.8889  |         |
| NICS                  | Virus ID <sup>1</sup>    | Chimpanzees Infected (#)    | Overall (n=28)     | Male (n=12)       | Female (n=16)      | Odds Ratio                                          | p value    | Male (n=12)   | Female (n=16) | U       | p value |
|                       | 3                        | 28                          | 100 (85.7, 100)    | 100 (71.8, 100)   | 100 (77.3, 100)    | 0.76 (0.01, 40.87)                                  | >0.9999    | 1.0681        | 1.2106        | 109     | 0.5676  |
|                       | 8                        | 11                          | 39.3 (23.5, 57.6)  | 33.3 (13.6, 61.2) | 43.8 (23.1, 66.9)  | 0.64 (0.14, 3.04)                                   | 0.8708     | 0.6188        | 0.3511        | 13      | 0.9273  |
|                       | 16                       | 6                           | 21.4 (9.9, 39.9)   | 16.7 (3.5, 46)    | 25 (9.7, 50)       | 0.6 (0.09, 3.99)                                    | 0.9585     | 0.9681        | 0.3948        | 2       | 0.5333  |
|                       | 17                       | 7                           | 25 (12.4, 43.6)    | 33.3 (13.6, 61.2) | 25 (9.7, 50)       | 1.5 (0.29, 7.81)                                    | 0.9449     | 0.5174        | 0.5869        | 10      | 0.6857  |
|                       | 18                       | 12                          | 42.9 (26.5, 61)    | 25 (8.3, 53.9)    | 56.3 (33.2, 76.9)  | 0.26 (0.05, 1.33)                                   | 0.2038     | 0.8343        | 0.5975        | 13      | 1       |
|                       | 19                       | 13                          | 46.4 (29.5, 64.2)  | 50 (25.4, 74.6)   | 43.8 (23.1, 66.9)  | 1.29 (0.29, 5.66)                                   | >0.9999    | 0.5329        | 0.5115        | 23      | 0.8357  |
|                       | 20                       | 27                          | 96.4 (80.8, >99.9) | 100 (71.8, 100)   | 93.8 (69.2, >99.9) | 2.42 (0.09, 64.68)                                  | 0.6253     | 1.0832        | 1.1072        | 88      | 0.9427  |
|                       | 21                       | 19                          | 67.9 (49.2, 82.2)  | 58.3 (31.9, 80.7) | 68.8 (44.2, 86.1)  | 0.64 (0.13, 3.03)                                   | 0.8607     | 0.7333        | 0.5902        | 39      | 0.7168  |
|                       | 22                       | 16                          | 57.1 (39.1, 73.5)  | 75 (46.2, 91.7)   | 43.8 (23.1, 66.9)  | 3.86 (4.07, 79.26)                                  | 0.2038     | 0.5921        | 0.7455        | 45      | 0.1738  |
| 23                    | 9                        | 32.1 (17.8, 50.8)           | 41.7 (19.3, 68.1)  | 25 (9.7, 50)      | 2.14 (0.43, 10.74) | 0.5971                                              | 0.4505     | 0.8316        | 13            | 0.5556  |         |

<sup>1</sup>Refers to Table 1.

<sup>2</sup>Prevalence with 95% confidence intervals calculated using the modified Wald method, shown in parentheses. Odds ratios with 95% confidence intervals in parentheses. P values were calculated using Fisher's exact tests (two-tailed).

<sup>3</sup>Average viral load by sex with Mann-Whitney U statistics, and associated p values (infected chimpanzees only).

**Table S3. Viral loads and richness of TCS chimpanzees**

| Chimpanzee | Viral load (log <sub>10</sub> vRPM/kb) |        |        |        |        |        |        |        |        |        |        |             | Richness |
|------------|----------------------------------------|--------|--------|--------|--------|--------|--------|--------|--------|--------|--------|-------------|----------|
|            | Virus <sup>†</sup>                     |        |        |        |        |        |        |        |        |        |        |             |          |
|            | 1                                      | 4      | 6      | 7      | 9      | 10     | 11     | 12     | 13     | 24     | 25     | All (Total) |          |
| SLE02      | 3.551748                               | 0      | 0      | 0      | 0.5515 | 1.207  | 0      | 1.6705 | 1.2524 | 2.0367 | 0      | 3.196657318 | 6        |
| SLE05      | 0.293238                               | 0      | 0      | 0      | 0      | 0      | 0      | 0.8218 | 0      | 1.7645 | 0      | 0.654002151 | 3        |
| SLE07      | 0.226466                               | 0      | 0      | 0      | 0      | 0      | 0      | 0      | 0      | 0      | 0      | 0.114008845 | 1        |
| SLE08      | 0.027899                               | 0      | 0      | 0      | 0      | 0.1409 | 0      | 0      | 0      | 3.4244 | 0      | 2.118429447 | 3        |
| SLE09      | 0.024781                               | 1.0116 | 0      | 0      | 0      | 0      | 1.1102 | 0      | 0      | 0.2513 | 0      | 0.315581207 | 4        |
| SLE12      | 2.973542                               | 0      | 0      | 0      | 0      | 0.477  | 0.9132 | 0      | 1.8769 | 0      | 0      | 2.620076188 | 4        |
| SLE14      | 2.702785                               | 0      | 0      | 0      | 0.4079 | 0      | 0      | 0      | 0      | 0.3567 | 0      | 2.346355833 | 3        |
| SLE16      | 0.528688                               | 0      | 0      | 0      | 0.1232 | 2.0701 | 0      | 2.3774 | 2.1693 | 2.6944 | 0      | 1.729944112 | 6        |
| SLE18      | 3.212114                               | 0      | 0      | 0.0859 | 1.4966 | 0      | 0      | 0      | 0.2664 | 0      | 0      | 2.856360614 | 4        |
| SLE23      | 0.013383                               | 0      | 0      | 0      | 0      | 0      | 0      | 0.1635 | 0      | 1.7149 | 0      | 0.548021189 | 3        |
| SLE24      | 0.057062                               | 0      | 0      | 0      | 0      | 0      | 0.5111 | 0      | 0      | 0      | 0      | 0.07565127  | 2        |
| SLE25      | 0.131872                               | 0      | 0.0429 | 0      | 0      | 0      | 0      | 0      | 0      | 0      | 0.7729 | 0.091393115 | 3        |
| SLE26      | 0.159823                               | 0      | 1.2406 | 0      | 0      | 0      | 0      | 0.1442 | 2.6205 | 1.6952 | 0      | 1.353497847 | 5        |
| SLE27      | 0.097073                               | 0      | 0      | 0      | 0      | 0      | 0      | 0      | 0      | 0.2223 | 0      | 0.057902187 | 2        |
| SLE28      | 2.985087                               | 0      | 0      | 0      | 0      | 1.156  | 1.067  | 0.9386 | 0.7221 | 2.8562 | 0      | 2.664427898 | 6        |
| SLE30      | 1.354374                               | 0      | 0      | 0      | 0      | 0      | 0.1298 | 0      | 0.1794 | 0      | 0      | 1.022055291 | 3        |

<sup>†</sup>Refers to Table 1

**Table S4. Viral loads and richness of TCRC chimpanzees****Viral load (log<sub>10</sub> vRPM/kb)**

| Chimpanzee | Virus <sup>†</sup> |        |        |        |        |             | Richness |
|------------|--------------------|--------|--------|--------|--------|-------------|----------|
|            | 2                  | 5      | 14     | 15     | 26     | All (Total) |          |
| ROC01      | 0.1077             | 0      | 0.4598 | 1.0436 | 0.1445 | 0.288844861 | 4        |
| ROC24      | 0                  | 0      | 0      | 0      | 3.1544 | 2.404452543 | 1        |
| ROC09      | 0.0627             | 0      | 0      | 0      | 0      | 0.040012777 | 1        |
| ROC21      | 0.5355             | 0      | 0      | 0      | 0      | 0.399945704 | 1        |
| ROC08      | 0.3289             | 0      | 0      | 0      | 0      | 0.231484479 | 1        |
| ROC25      | 0.0405             | 0      | 0      | 0      | 3.1075 | 2.357785641 | 2        |
| ROC14      | 0                  | 0      | 0      | 0      | 0      | 0           | 0        |
| ROC12      | 0                  | 0      | 0      | 0      | 0.0845 | 0.016237646 | 1        |
| ROC16      | 0                  | 0      | 0.9844 | 0.6062 | 0.4127 | 0.215585924 | 3        |
| ROC05      | 0.3283             | 0      | 0      | 0      | 0      | 0.231026098 | 1        |
| ROC07      | 0                  | 0      | 0      | 0      | 0      | 0           | 0        |
| ROC23      | 0.3178             | 0      | 0      | 0      | 0      | 0.222832354 | 1        |
| ROC13      | 0.0442             | 0      | 0      | 0      | 0.3275 | 0.102452857 | 2        |
| ROC10      | 0.2757             | 0      | 0.4738 | 0.5082 | 0.1506 | 0.248342937 | 4        |
| ROC26      | 0                  | 0      | 0      | 0      | 0      | 0           | 0        |
| ROC20      | 0                  | 0      | 0      | 0      | 0.2215 | 0.048416986 | 1        |
| ROC15      | 0                  | 0      | 0      | 0.2017 | 0      | 0.016646469 | 1        |
| ROC06      | 0.2398             | 0      | 0      | 0      | 0.2541 | 0.203844221 | 2        |
| ROC11      | 3.4425             | 0      | 0      | 0      | 0      | 3.23606087  | 1        |
| ROC03      | 2.7605             | 0      | 0      | 0.5036 | 0      | 2.554581368 | 2        |
| ROC02      | 0.077              | 1.1826 | 0      | 0      | 0      | 0.443661409 | 2        |
| ROC17      | 0.0578             | 0      | 0      | 0      | 0.2427 | 0.086780833 | 2        |
| ROC18      | 0                  | 0      | 0      | 0      | 0      | 0           | 0        |
| ROC22      | 0.1492             | 0      | 0      | 0      | 0      | 0.098581764 | 1        |
| ROC19      | 0.0905             | 0      | 0      | 0      | 0      | 0.058458577 | 1        |

<sup>†</sup>Refers to Table 1

**Table S5. Viral loads and richness of NICS chimpanzees**

| Chimpanzee | Viral load (log <sub>10</sub> vRPM/kb) |        |        |        |        |        |        |        |        |        | All (Total) | Richness |
|------------|----------------------------------------|--------|--------|--------|--------|--------|--------|--------|--------|--------|-------------|----------|
|            | Virus <sup>†</sup>                     |        |        |        |        |        |        |        |        |        |             |          |
|            | 3                                      | 8      | 16     | 17     | 18     | 19     | 20     | 21     | 22     | 23     |             |          |
| UGA24      | 2.0138                                 | 0.808  | 0      | 0      | 0      | 0      | 0.4913 | 0      | 0      | 0      | 1.630994    | 3        |
| UGA42      | 3.4572                                 | 1.6748 | 0      | 0      | 0      | 0      | 0.7104 | 0      | 0.4741 | 0.32   | 3.064629    | 5        |
| UGA37      | 1.224                                  | 0      | 0      | 0      | 0      | 0      | 1.186  | 0.3376 | 0.3931 | 0.4998 | 0.961578    | 5        |
| UGA08      | 0.5127                                 | 0.4045 | 0      | 0      | 0      | 0      | 0.9363 | 0.3968 | 0.9088 | 0      | 0.508235    | 5        |
| UGA14      | 0.498                                  | 0      | 0      | 0      | 0      | 0      | 0.8967 | 0      | 0      | 0      | 0.413285    | 2        |
| UGA25      | 0.5817                                 | 0.2521 | 0      | 0.1609 | 0      | 0.1461 | 0.5845 | 0      | 0      | 0      | 0.40609     | 5        |
| UGA36      | 1.1668                                 | 0.2904 | 0      | 0      | 0      | 0      | 1.0617 | 0.3241 | 0      | 0      | 0.888915    | 4        |
| UGA02      | 1.0417                                 | 0.311  | 0      | 0      | 0      | 0      | 0.634  | 0      | 0.1787 | 0      | 0.737374    | 4        |
| UGA15      | 1.4427                                 | 0.2807 | 0      | 0      | 0.2789 | 0      | 0.7724 | 0.6886 | 0      | 0.7172 | 1.11076     | 6        |
| UGA03      | 1.4666                                 | 0      | 0      | 0      | 0      | 0      | 0.0847 | 0      | 0.1656 | 0      | 1.095692    | 3        |
| UGA23      | 1.6698                                 | 0      | 0      | 0      | 0.155  | 0      | 0.6154 | 0      | 0      | 0      | 1.297119    | 3        |
| UGA01      | 0.195                                  | 0      | 0      | 0      | 0      | 0      | 0      | 0      | 0      | 0      | 0.089473    | 1        |
| UGA22      | 0.1624                                 | 0.1551 | 0.4577 | 0.173  | 0.7206 | 0.4387 | 0.4384 | 0      | 0.5448 | 1.7276 | 0.738496303 | 9        |
| UGA45      | 0.2869                                 | 0      | 0      | 0      | 0.4118 | 0      | 1.1336 | 0.5414 | 0      | 0      | 0.466525    | 4        |
| UGA34      | 1.2953                                 | 0      | 0      | 0      | 0.1291 | 0.276  | 0.8731 | 1.3614 | 0.7339 | 0.5433 | 1.044021    | 7        |
| UGA38      | 0.7186                                 | 0      | 0      | 0      | 0.2324 | 0.1345 | 0.7283 | 0.7125 | 0      | 0      | 0.542362    | 5        |
| UGA43      | 0.6213                                 | 0      | 0.2773 | 0.9289 | 1.3838 | 0.9302 | 2.2225 | 0.7377 | 0      | 1.3085 | 1.375318    | 8        |
| UGA28      | 0.9414                                 | 0.2673 | 0.6723 | 1.0669 | 1.6832 | 1.3016 | 2.5498 | 0.7984 | 0      | 0      | 1.669235    | 8        |
| UGA04      | 0.9344                                 | 0      | 1.6512 | 1.5815 | 2.0785 | 1.9562 | 2.9522 | 0.3728 | 0.4317 | 0      | 2.068838    | 8        |
| UGA30      | 1.9391                                 | 0      | 0.172  | 0.1787 | 0.4426 | 0.3733 | 1.2286 | 0.378  | 0.7934 | 0.1202 | 1.579745    | 9        |
| UGA05      | 0.6116                                 | 0      | 0      | 0      | 0      | 0.0791 | 0.6577 | 0.9934 | 0.6832 | 0.2651 | 0.534055    | 6        |
| UGA13      | 1.5281                                 | 0      | 0      | 0.0896 | 0.1456 | 0      | 0.8768 | 0.5437 | 0.7243 | 0      | 1.184762    | 6        |
| UGA18      | 1.6363                                 | 0      | 0      | 0      | 0      | 0      | 2.0129 | 0.3578 | 1.0258 | 0      | 1.467282    | 4        |
| UGA33      | 1.1645                                 | 0      | 0      | 0      | 0      | 0      | 1.1154 | 0.7851 | 1.0329 | 0.4584 | 0.938028    | 5        |
| UGA06      | 0.5856                                 | 0.2678 | 0.285  | 0.2378 | 0      | 0.5294 | 1.4247 | 1.5412 | 1.4059 | 0      | 0.927018    | 8        |
| UGA26      | 0.3143                                 | 0      | 0      | 0      | 0      | 0.3185 | 1.7683 | 1.07   | 0.8882 | 0      | 0.932796    | 5        |
| UGA35      | 0.1736                                 | 0      | 0      | 0      | 0      | 0.1683 | 1.084  | 0.319  | 0.1622 | 0      | 0.397874    | 5        |
| UGA31      | 4.0036                                 | 0.221  | 0      | 0      | 0.2194 | 0.1262 | 0.5676 | 0.0995 | 0      | 0      | 3.609834    | 6        |

<sup>†</sup>Refers to Table 1

**Table S6. Statistical comparisons of viral richness and total viral load Original**

| <b>Richness</b>                                   |                    |                         |                                              |
|---------------------------------------------------|--------------------|-------------------------|----------------------------------------------|
| <b>1) Kruskal-Wallis rank sum test</b>            |                    |                         |                                              |
| <b>Chi-squared</b>                                | <b>df</b>          | <b>p value</b>          |                                              |
| 39.386                                            | 2                  | 2.80E-09                |                                              |
| <b>2) Wilcoxon rank sum test</b>                  |                    |                         |                                              |
| <b>Sanctuary 1</b>                                | <b>Sanctuary 2</b> | <b>Original p value</b> | <b>Adjusted p value (Benjamini-Hochberg)</b> |
| TCS                                               | NICS               | 7.60E-03                | 7.60E-03                                     |
| TCS                                               | TCRC               | 2.30E-05                | 3.53-05                                      |
| NICS                                              | TCRC               | 1.10E-08                | 3.30E-08                                     |
| <b>Total Viral Load (log<sub>10</sub>vRPM/kb)</b> |                    |                         |                                              |
| <b>1) Kruskal-Wallis rank sum test</b>            |                    |                         |                                              |
| <b>Chi-squared</b>                                | <b>df</b>          | <b>p value</b>          |                                              |
| 17.091                                            | 2                  | 0.00019                 |                                              |
| <b>2) Wilcoxon rank sum test</b>                  |                    |                         |                                              |
| <b>Sanctuary 1</b>                                | <b>Sanctuary 2</b> | <b>Original p value</b> | <b>Adjusted p value (Benjamini-Hochberg)</b> |
| TCS                                               | NICS               | 0.7814                  | 0.78                                         |
| TCS                                               | TCRC               | 0.0072                  | 0.011                                        |
| NICS                                              | TCRC               | 4.30E-05                | 0.00013                                      |
